# Supplementary material for: Assessment of the properties of natural-based chiral deep eutectic solvents for chiral drug separation: insights from molecular dynamics simulation
Source: Royal Society of Chemistry journal article supplement (doi:10.1039/d3cp00875d), 2023-01-01
Supplement: d3cp00875d1.pdf [file d3cp00875d1.pdf]

# “Supporting Information”

## **Assessment of Natural-based Chiral Deep Eutectic Solvents Properties for Chiral Drugs Separation: Insights from Molecular Dynamics Simulation**

Parisa Jahanbakhsh-Bonab <sup>a</sup>, Gholamreza Pazuki <sup>a</sup>, Jaber Jahanbin Sardroodi <sup>b, c</sup>, Seyed Mohsen  
Dehnavi <sup>d</sup>

*<sup>a</sup> Department of Chemical Engineering, Amirkabir University of Technology, No. 424, Hafez Ave.,  
P.O. Box 15875-4413, Tehran, Iran.*

*<sup>b</sup> Department of Chemistry, Faculty of Basic Sciences, Azarbaijan Shahid Madani University,  
Tabriz, Iran.*

*<sup>c</sup> Molecular Sciences and Engineering Research Group (MSERG), Azarbaijan Shahid Madani  
University, Tabriz, Iran*

*<sup>d</sup> Department of Cell and Molecular Biology, Faculty of Life Science and Biotechnology, Shahid  
Beheshti University, P.O. Box 1983969411, Tehran, Iran*

**Figures:**

**Figure S1.** The snapshot of simulation boxes of a) DES1 consisting of 300 acetic acid (orange), 150 R-menthol (purple), 150 S-menthol (green), b) DES2 consisting of 200 lauric acid (yellow), 200 R-menthol, 200 S-menthol, and c) DES3 consisting of 400 pyruvic acid (blue), 100 R-menthol, 100 S-menthol.

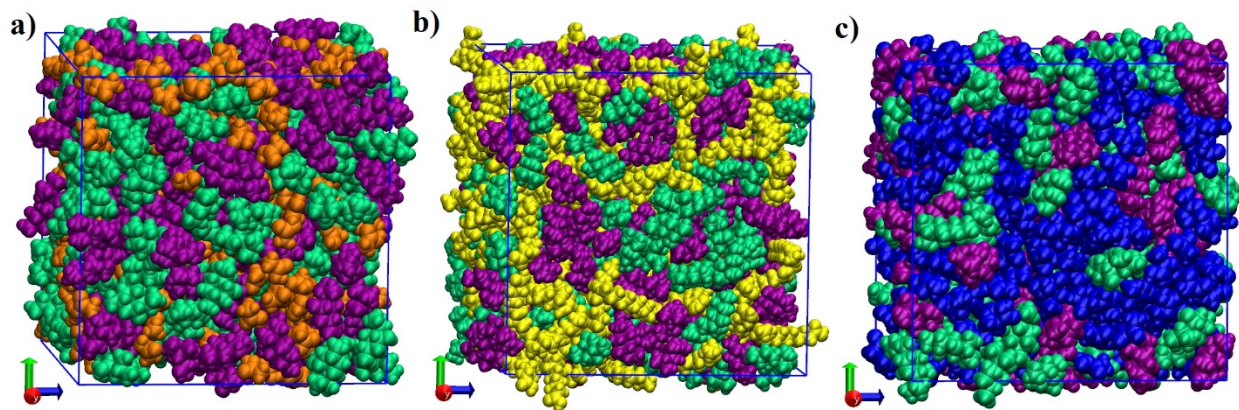

**Figure S2.** The radial distribution function of the alky hydrogen of DLM (H2) around the carbonyl oxygen of acids, (a); the cyclic hydrogen of DLM (H9) around the carbonyl oxygen of acids, (b); and the alkyl hydrogen of DLM (H15) around the carbonyl oxygen of acids, (c).

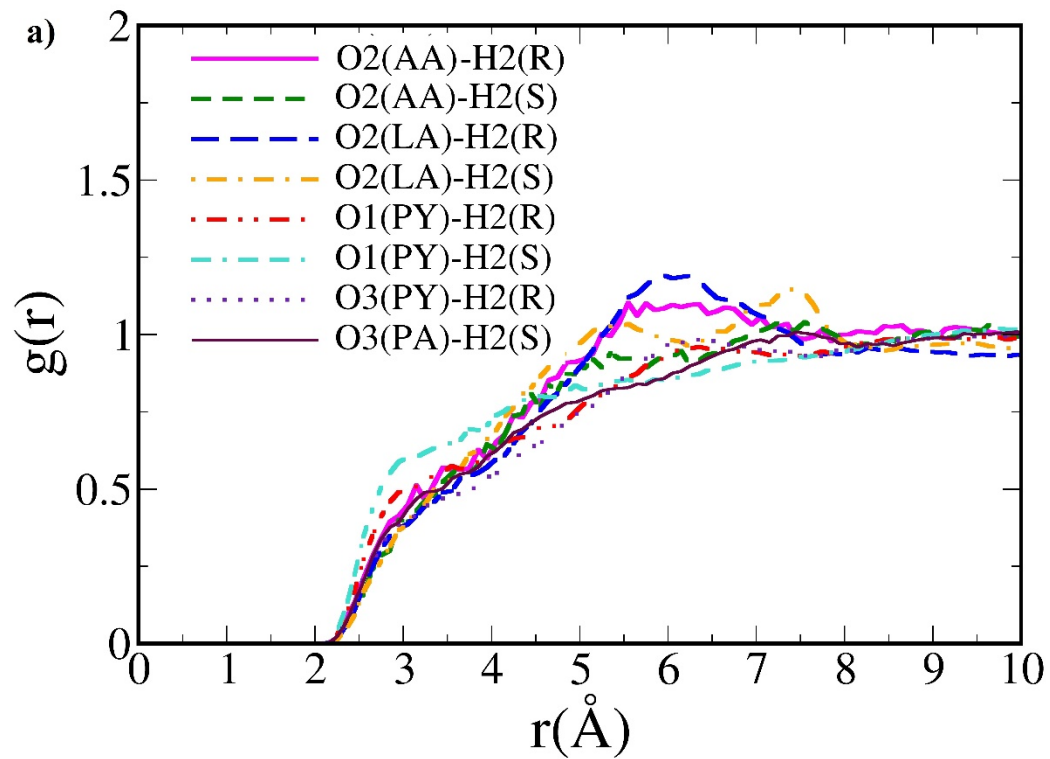

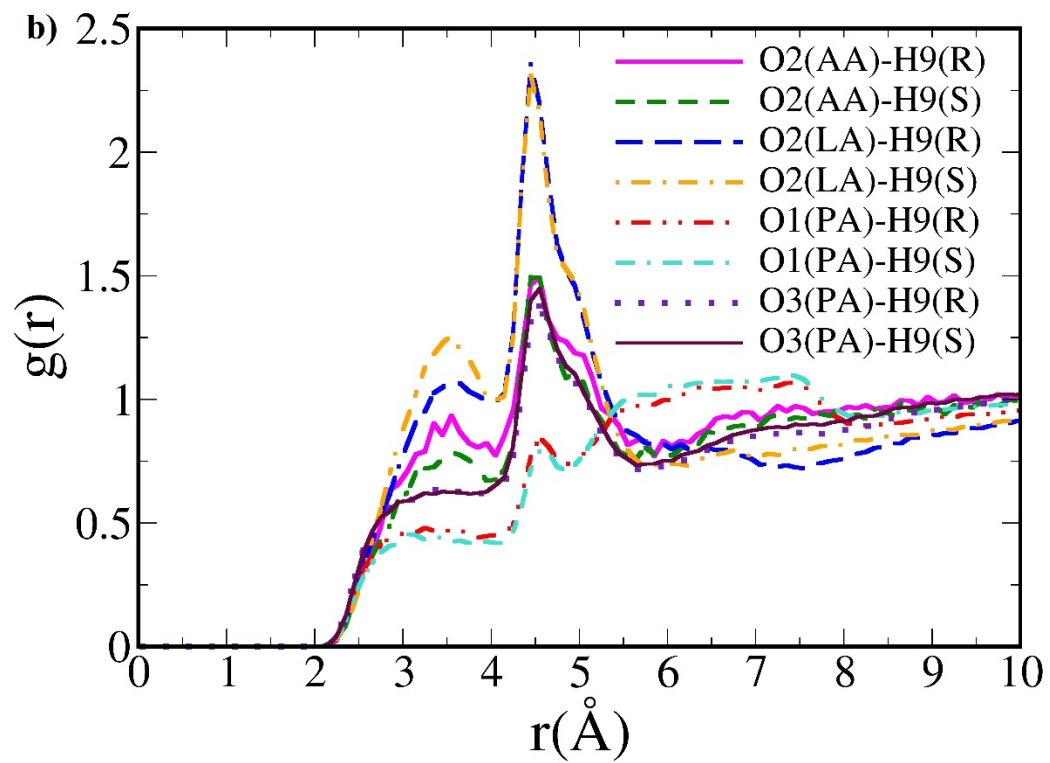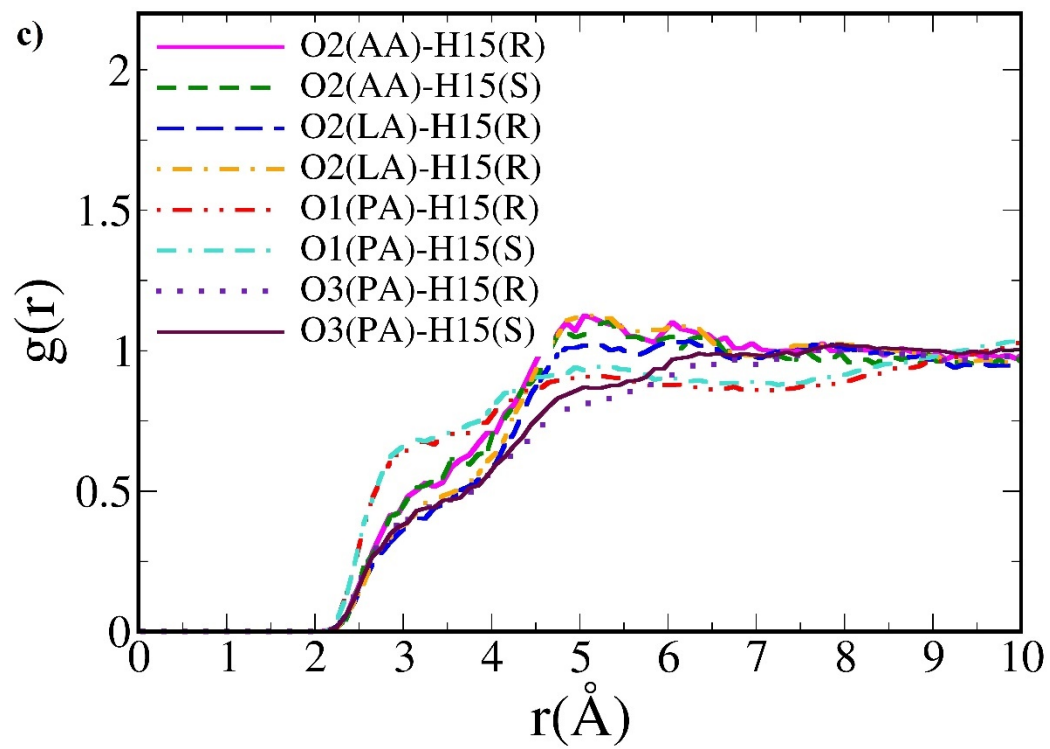

**Figure S3.** The assessment of beta parameter for DES1; a, DES2; b, and DES3; c.

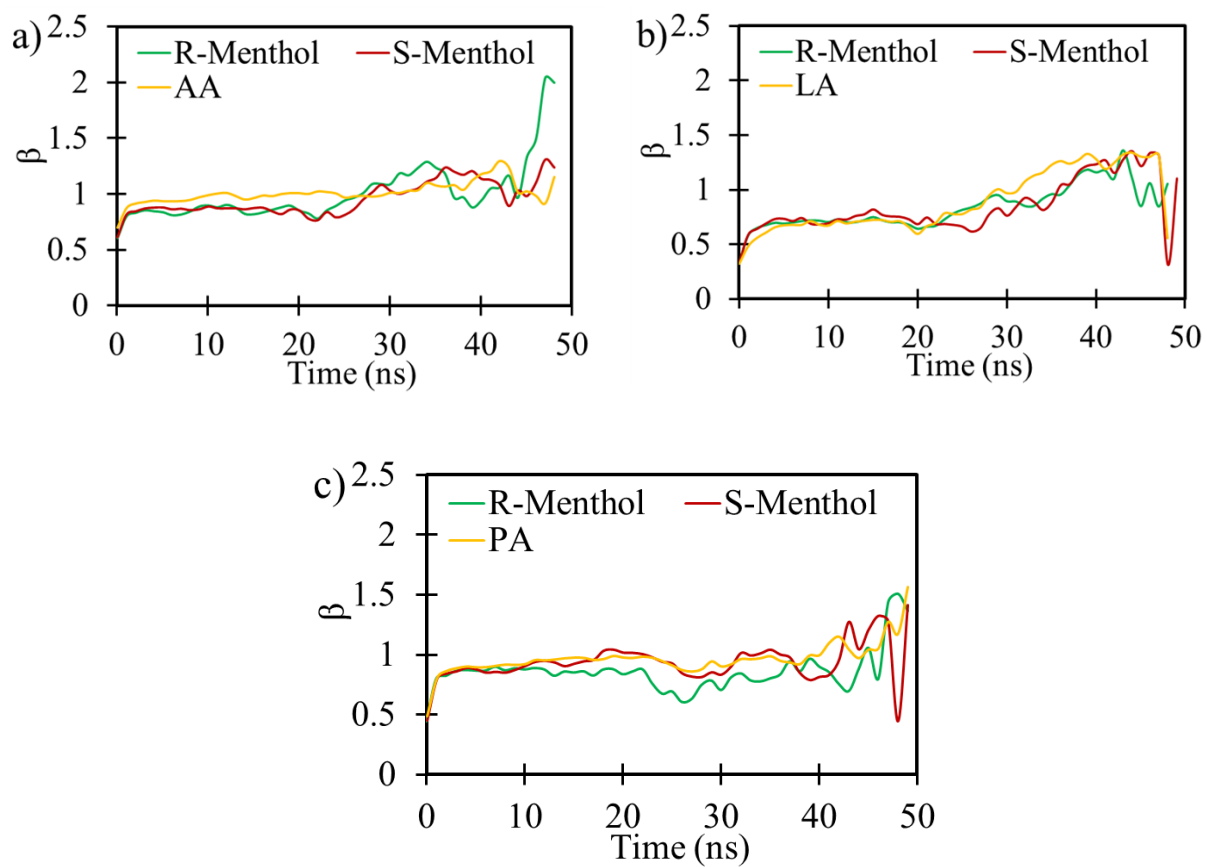

**Tables:****Table S1.** The partial charges and vdW parameter for R ad S-menthol.

| <b>Atom type of R ad S-menthol</b> | <b>Partial charges of R ad S-menthol</b> | <b><math>\epsilon_i</math> (kcal/mol)</b> | <b><math>\sigma_i</math> (Å)</b> |
|------------------------------------|------------------------------------------|-------------------------------------------|----------------------------------|
| <b>C1, C3</b>                      | -0.1636                                  | 0.055                                     | 4.35                             |
| <b>C2</b>                          | 0.1219                                   | 0.055                                     | 4.35                             |
| <b>C4</b>                          | -0.0023                                  | 0.055                                     | 4.35                             |
| <b>C5</b>                          | -0.0973                                  | 0.055                                     | 4.35                             |
| <b>C6</b>                          | -0.0699                                  | 0.055                                     | 4.35                             |
| <b>C7</b>                          | 0.0943                                   | 0.055                                     | 4.35                             |
| <b>C8</b>                          | -0.1901                                  | 0.055                                     | 4.35                             |
| <b>C9</b>                          | -0.1531                                  | 0.055                                     | 4.35                             |
| <b>C10</b>                         | -0.0921                                  | 0.055                                     | 4.35                             |
| <b>O1</b>                          | -0.6921                                  | 0.1521                                    | 3.54                             |
| <b>H1, H2, H3, H5, H6, H7</b>      | 0.0358                                   | 0.022                                     | 2.64                             |
| <b>H4</b>                          | -0.0003                                  | 0.022                                     | 2.64                             |
| <b>H8</b>                          | 0.0622                                   | 0.022                                     | 2.64                             |
| <b>H9, H10</b>                     | 0.0360                                   | 0.022                                     | 2.64                             |
| <b>H11, H12</b>                    | 0.0286                                   | 0.022                                     | 2.64                             |
| <b>H13</b>                         | 0.0100                                   | 0.022                                     | 2.64                             |
| <b>H14, H15, H16</b>               | 0.0425                                   | 0.022                                     | 2.64                             |
| <b>H17, H18</b>                    | 0.0889                                   | 0.022                                     | 2.64                             |
| <b>H19</b>                         | 0.0618                                   | 0.022                                     | 2.64                             |
| <b>H20</b>                         | 0.4407                                   | 0.0460                                    | 0.449                            |

**Table S2.** The partial charges and vdW parameter for acetic acid.

| <b>Atom type of acetic acid</b> | <b>Partial charges of AA</b> | <b><math>\epsilon_i</math> (kcal/mol)</b> | <b><math>\sigma_i</math> (Å)</b> |
|---------------------------------|------------------------------|-------------------------------------------|----------------------------------|
| <b>C1</b>                       | -0.2913                      | 0.055                                     | 4.35                             |
| <b>C2</b>                       | 0.8099                       | 0.11                                      | 4                                |
| <b>O1</b>                       | -0.6621                      | 0.152                                     | 3.540                            |
| <b>O2</b>                       | -0.6025                      | 0.1200                                    | 3.40                             |
| <b>H1, H2, H3</b>               | 0.0978                       | 0.022                                     | 2.64                             |
| <b>H4</b>                       | 0.4526                       | 0.046                                     | 0.449                            |

**Table S3.** The partial charges and vdW parameter for lauric acid.

| <b>Atom type of lauric acid</b> | <b>Partial charges of lauric acid</b> | <b><math>\epsilon_i</math> (kcal/mol)</b> | <b><math>\sigma_i</math> (Å)</b> |
|---------------------------------|---------------------------------------|-------------------------------------------|----------------------------------|
| <b>C1</b>                       | 0.7793                                | 0.11                                      | 4.00                             |
| <b>C2</b>                       | -0.0456                               | 0.055                                     | 4.35                             |
| <b>C3</b>                       | -0.0109                               | 0.055                                     | 4.35                             |
| <b>C4</b>                       | 0.0086                                | 0.055                                     | 4.35                             |
| <b>C5</b>                       | 0.0095                                | 0.055                                     | 4.35                             |
| <b>C6, C10</b>                  | 0.0103                                | 0.055                                     | 4.35                             |
| <b>C8</b>                       | 0.0235                                | 0.055                                     | 4.35                             |
| <b>C9</b>                       | 0.0028                                | 0.055                                     | 4.35                             |
| <b>C11</b>                      | 0.0332                                | 0.055                                     | 4.35                             |
| <b>C12</b>                      | -0.0768                               | 0.055                                     | 4.35                             |
| <b>O1</b>                       | -0.6954                               | 0.1521                                    | 3.54                             |
| <b>O2</b>                       | -0.6108                               | 0.1200                                    | 3.40                             |
| <b>H1, H2</b>                   | 0.0392                                | 0.022                                     | 2.64                             |
| <b>H3, H4</b>                   | 0.0111                                | 0.022                                     | 2.64                             |
| <b>H5, H6</b>                   | -0.0048                               | 0.022                                     | 2.64                             |
| <b>H7, H8</b>                   | 0.0006                                | 0.022                                     | 2.64                             |
| <b>H9, H10</b>                  | -0.0050                               | 0.022                                     | 2.64                             |
| <b>H11, H12</b>                 | -0.0066                               | 0.022                                     | 2.64                             |
| <b>H13, H14</b>                 | -0.0103                               | 0.022                                     | 2.64                             |
| <b>H15, H16</b>                 | -0.0059                               | 0.022                                     | 2.64                             |
| <b>H17, H18</b>                 | -0.0004                               | 0.022                                     | 2.64                             |
| <b>H19, H20</b>                 | -0.0023                               | 0.022                                     | 2.64                             |
| <b>H21, H22 H23</b>             | 0.0154                                | 0.022                                     | 2.64                             |
| <b>H24</b>                      | 0.4700                                | 0.046                                     | 0.449                            |



**Table S4.** The partial charges and vdW parameter for pyraviv acid.

| <b>Atom type of pyraviv acid</b> | <b>Partial charges of pyraviv acid</b> | <b><math>\epsilon_i</math> (kcal/mol)</b> | <b><math>\sigma_i</math> (Å)</b> |
|----------------------------------|----------------------------------------|-------------------------------------------|----------------------------------|
| <b>C1</b>                        | -0.2071                                | 0.055                                     | 4.35                             |
| <b>C2</b>                        | 0.5187                                 | 0.11                                      | 4.00                             |
| <b>C3</b>                        | 0.6937                                 | 0.11                                      | 4.00                             |
| <b>O1</b>                        | -0.4801                                | 0.12                                      | 3.40                             |
| <b>O2</b>                        | -0.6783                                | 0.1521                                    | 3.54                             |
| <b>O3</b>                        | -0.5479                                | 0.12                                      | 3.40                             |
| <b>H1, H2, H3</b>                | 0.0735                                 | 0.022                                     | 2.64                             |
| <b>H4</b>                        | 0.4805                                 | 0.046                                     | 0.449                            |

**Table S5.** The simulated and experimental density (in g/cm<sup>3</sup>) of the studied systems at 298.15 K.

| <b>Species</b>      | <b>Systems</b>                    |             |             |
|---------------------|-----------------------------------|-------------|-------------|
|                     | <b>DES1</b>                       | <b>DES2</b> | <b>DES3</b> |
|                     | <b>Density (g/cm<sup>3</sup>)</b> |             |             |
| <b>Simulated</b>    | 0.942±0.008                       | 0.915±0.002 | 1.006±0.007 |
| <b>Experimental</b> | 0.931                             | 0.894       | 0.995       |
| <b>Deviation</b>    | 1.18%                             | 2.35%       | 1.10%       |
|                     | <b>Viscosity (mPa.s)</b>          |             |             |
| <b>Simulated</b>    | 9.83                              | 36.25       | 31.81       |
| <b>Experimental</b> | 8.69                              | 24.42       | 29.95       |
| <b>Deviation</b>    | 13.12%                            | 48.44%      | 6.21%       |

**Table S6.** Coordination number ( $N_{i,j}$ ) of Gly, and choline around the Cl through different sites. The  $N_{i,j}$  indicate the coordination number of  $j$ th species around  $i$ th species.

| $N_{i,j}$              | First min position (Å) | DES Type |       |       |
|------------------------|------------------------|----------|-------|-------|
|                        |                        | DES1     | DES2  | DES3  |
| $N_{H18(R)-O=C}$       | 2.75                   | 0.228    | 0.292 | 0.072 |
|                        |                        |          |       | 0.115 |
| $N_{H18(S)-O=C}$       | 2.75                   | 0.245    | 0.328 | 0.076 |
|                        |                        |          |       | 0.125 |
| $N_{H18(R)-OH(Acid)}$  | 2.55                   | 0.027    | 0.031 | 0.012 |
| $N_{H18(S)-OH(Acid)}$  | 2.55                   | 0.022    | 0.041 | 0.012 |
| $N_{HO(Acid)-OH18(R)}$ | 2.75                   | 0.229    | 0.282 | 0.180 |
| $N_{HO(Acid)-OH18(S)}$ | 2.75                   | 0.204    | 0.288 | 0.180 |
| $N_{H15(R)-O=C}$       | 3.55                   | 0.081    | 0.053 | 0.082 |
|                        |                        |          |       | 0.050 |
| $N_{H15(S)-O=C}$       | 3.55                   | 0.082    | 0.056 | 0.081 |
|                        |                        |          |       | 0.050 |
| $N_{H9(R)-O=C}$        | 4.05                   | 0.227    | 0.219 | 0.097 |
|                        |                        |          |       | 0.130 |
| $N_{H9(S)-O=C}$        | 4.05                   | 0.198    | 0.241 | 0.091 |
|                        |                        |          |       | 0.129 |
| $N_{H2(R)-O=C}$        | 3.35                   | 0.056    | 0.040 | 0.046 |

|                                                     |      |       |       |       |
|-----------------------------------------------------|------|-------|-------|-------|
|                                                     |      |       |       | 0.037 |
| $\text{N}_{\text{H}_2(\text{S})=\text{O}=\text{C}}$ | 3.35 | 0.050 | 0.040 | 0.055 |
|                                                     |      |       |       | 0.039 |

**Table S7.** The diffusion coefficient of species (in Å<sup>2</sup>/ns) of the studied systems.

| Species             | Systems                                             |             |              |
|---------------------|-----------------------------------------------------|-------------|--------------|
|                     | DES1                                                | DES2        | DES3         |
|                     | <b>Diffusion coefficient<br/>(Å<sup>2</sup>/ns)</b> |             |              |
| <b>S-menthol</b>    | 1.148±0.008                                         | 0.222±0.002 | 0.6526±0.007 |
| <b>R-menthol</b>    | 1.174±0.01                                          | 0.227±0.002 | 0.8126±0.002 |
| <b>Acetic acid</b>  | 3.376±0.01                                          | ---         | ---          |
| <b>Lauric acid</b>  | ---                                                 | 0.294±0.001 | ---          |
| <b>Pyravic acid</b> | ---                                                 | ---         | 1.464±0.004  |
